# Supplementary material for: A Small Compound KJ-28d Enhances the Sensitivity of Non-Small Cell Lung Cancer to Radio- and Chemotherapy
Source: PubMed Central journal article supplement (PMC6928747; doi:10.3390/ijms20236026), 2019-11-29
Supplement: ijms-20-06026-s001.pdf [file ijms-20-06026-s001.pdf]

## Supplementary Materials

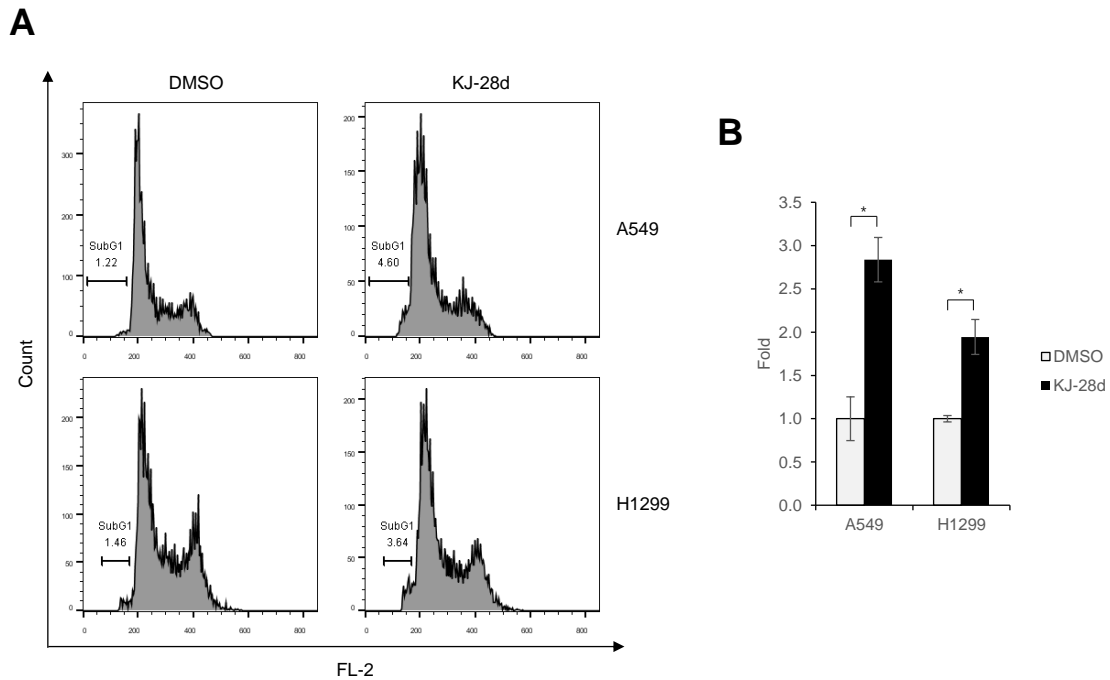

**Figure S1.** KJ-28d induces sub-G1 phase in A549 and H1299 cells. Human NSCLC A549 and H1299 cells were treated with 5  $\mu\text{M}$  KJ-28d for 24 h and stained with PI. The cell cycle distribution was analyzed by flow cytometry (A). The bar graph shows the quantitative analysis of FACS data (B). \* $p < 0.05$  versus corresponding values.

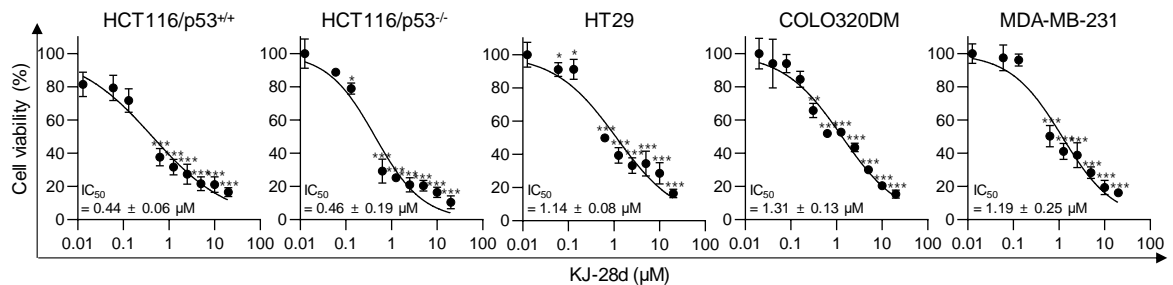

**Figure 2.** KJ-28d inhibits the proliferation of human cancer cells. Human colorectal cancer p53<sup>+/+</sup> HCT116, p53<sup>-/-</sup> HT29, and COLO320DM cells and human breast cancer MDA-MB-231 cells were treated with KJ-28d at indicated concentrations for 5 days and cell viabilities were determined using the MTT assay. Data are presented as means  $\pm$  standard deviation (SD) from at least three independent experiments. \* $p < 0.05$ , \*\* $p < 0.01$ , \*\*\* $p < 0.001$  versus DMSO-treated control.

**Table 1.** NSCLC cell lines used in this study.

| Cell line | KRAS                          | EGFR                                            | TP53       | KEAP1                           | Remarks                     |
|-----------|-------------------------------|-------------------------------------------------|------------|---------------------------------|-----------------------------|
| A549      | MT (missense)<br>34G>A, G12S  | WT                                              | WT         | MT (missense)<br>997G>T, G333C  | c-MYC: amplified            |
| H1299     | WT                            | WT                                              | Null       | WT                              | -                           |
| H1650     | WT                            | MT (deletion)<br>c2235-2249del,<br>E746-A750del | c.673-2A>G | WT                              | TP53: deletion in<br>intron |
| H460      | MT (missense)<br>183A>T, Q61H | WT                                              | WT         | MT (missense)<br>706 G>C, D236H | c-MYC: amplified            |

Note: Mutation status of each cell line was determined from the Sanger Catalogue of Somatic Mutations in Cancer database (COSMIC, <http://www.sanger.ac.uk/genetics/CGP/cosmic>). Abbreviation: WT, wild-type; MT, mutation

**Table S2.** Activities (%) of KJ-28d (5  $\mu$ M) against HDAC isoenzymes *in vitro*.

| HDAC isoenzyme | Activity (%) |
|----------------|--------------|
| DMSO           | 100.0        |
| HDAC1          | 82.4         |
| HDAC2          | 100.0        |
| HDAC3          | 100.0        |
| HDAC4          | 98.4         |
| HDAC5          | 92.5         |
| HDAC6          | 78.3         |
| HDAC7          | 100.0        |
| HDAC8          | 83.2         |
| HDAC9          | 100.0        |
| HDAC10         | 100.0        |
| HDAC11         | 78.3         |

### Supplementary Materials and Methods

*Sub-G1 analysis.* Cells were treated with 5  $\mu$ M KJ-28d. After 24 h treatment, cells were fixed in 70% cold ethanol overnight. For cell cycle analysis, fixed cells were treated with RNase for 20 min before addition of 5  $\mu$ g/mL PI and analyzed by flow cytometry (CyFlow cube 6).

*Cell culture.* Human breast cancer cells (MDA-MB-231) and human colon cancer cells (HT29 and COLO320-DM) were obtained from ATCC (American Type Culture Collection). p53<sup>+/+</sup> HCT116 and p53<sup>-/-</sup> HCT116 cells were kindly provided by Dr. Bert Vogelstein (Johns Hopkins University, Baltimore, MD, USA). Cells were maintained in Roswell Park Memorial Institute (RPMI) 1640 medium (Wegene) supplemented with 10 % fetal bovine serum (FBS; Wegene) and 100 units/mL penicillin streptomycin solution (Gibco) at 37 °C in a humidified 5 % CO<sub>2</sub> atmosphere.

*In vitro enzyme assay.* Enzyme activities of KJ-28d against HDAC isoenzymes (1-11) were performed Reaction Biology Corp. (Malvern, PA, USA).
